# Supplementary material
Source: ML conference proceedings conference paper supplement (https://aclanthology.org/2026.codi-1.9)

# What is the relation between X and Y?

*Choose the best description below*

Relation expresses a reliance between X and Y  
such as condition, cause-result, purpose,  
substitution, or concession

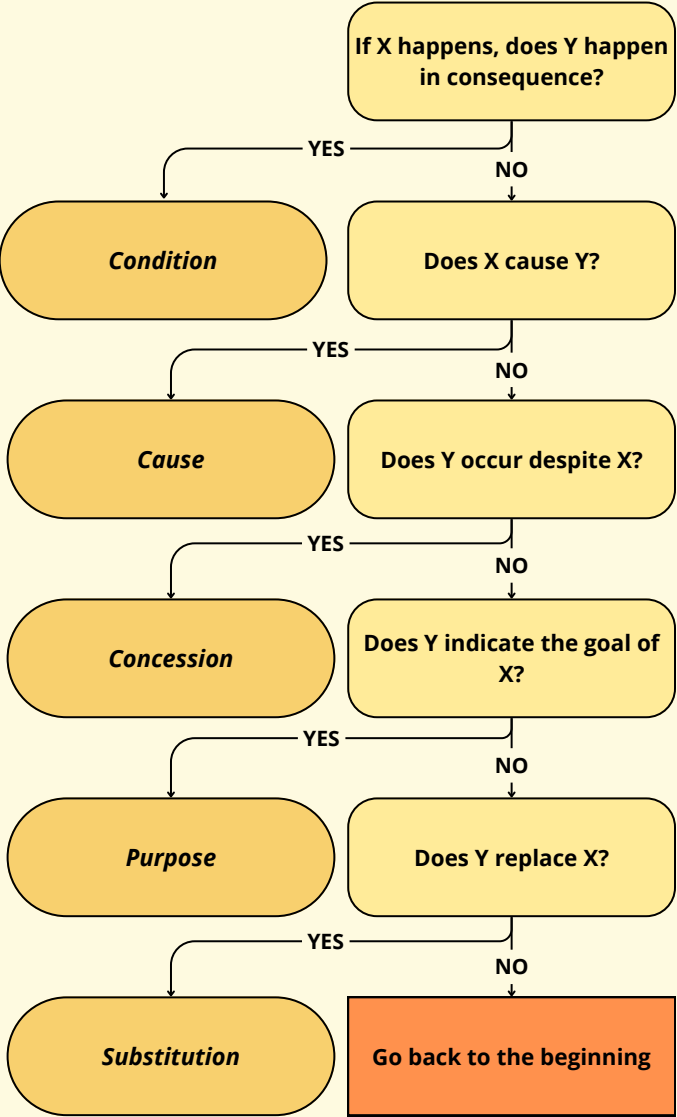

Relation expands or specifies X

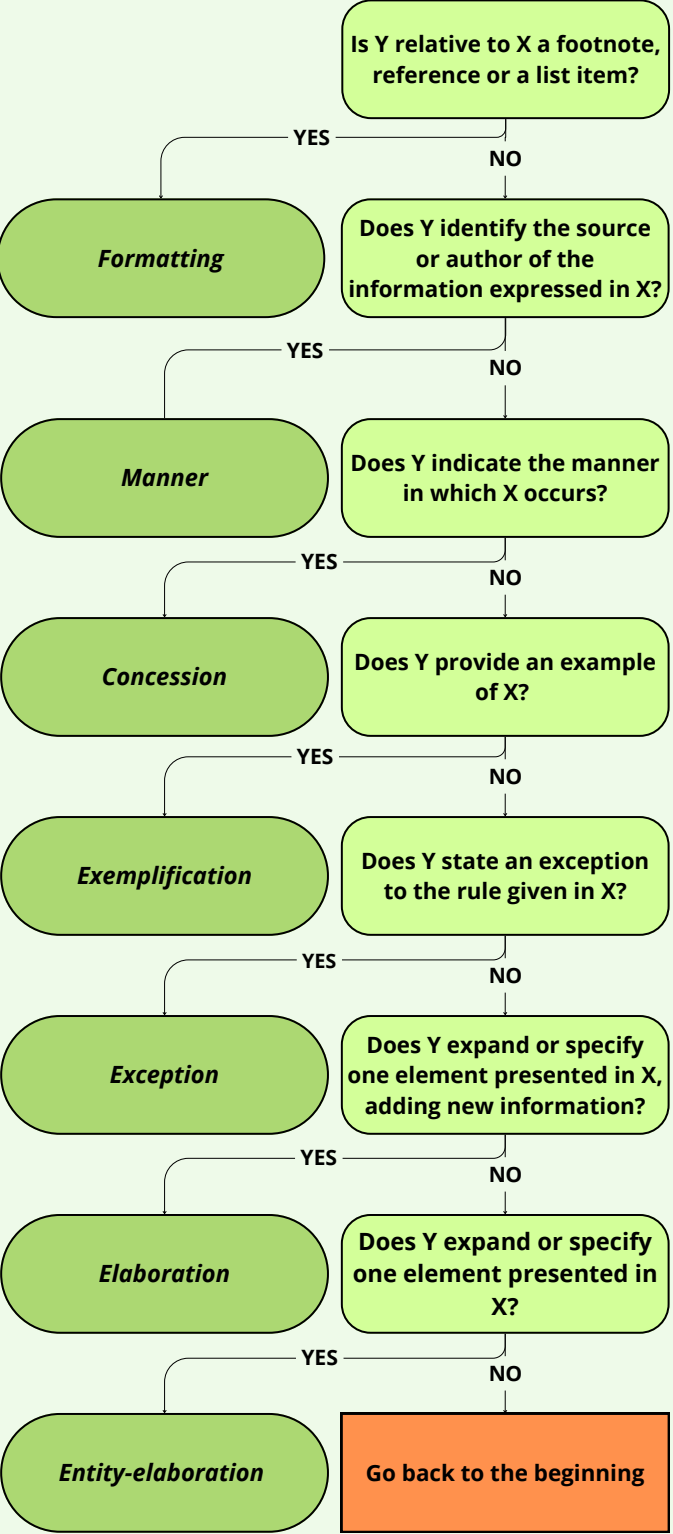

Relation compares, contrasts, presents an alternative, or expresses similarity between X and Y

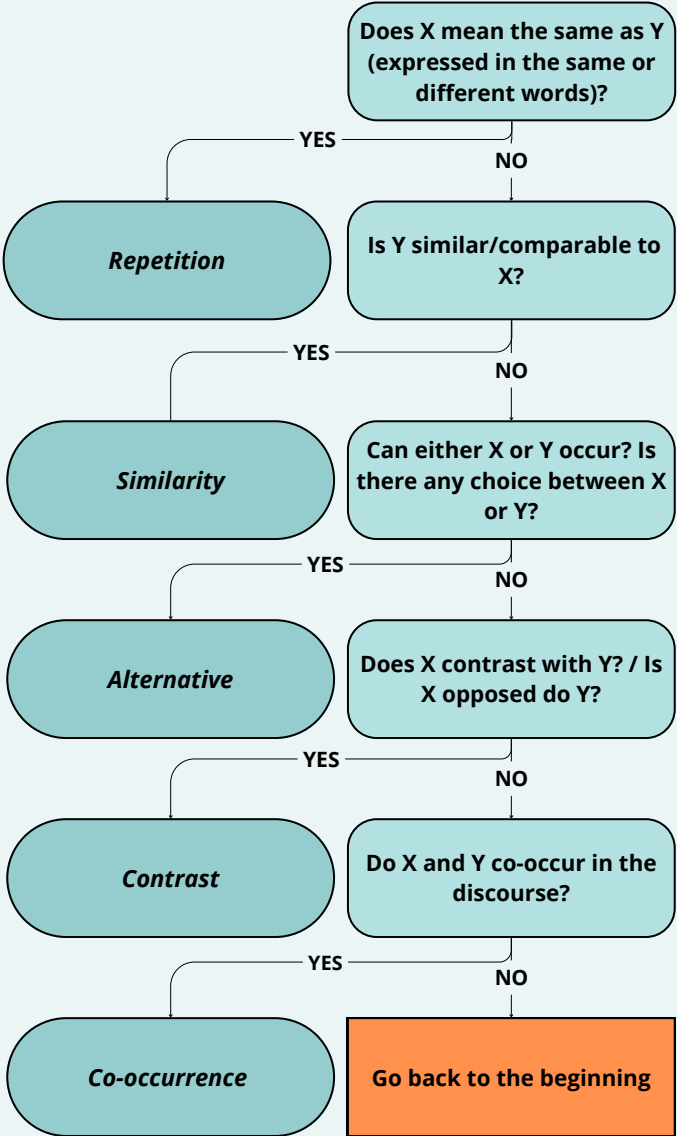

Relation is primarily pragmatic

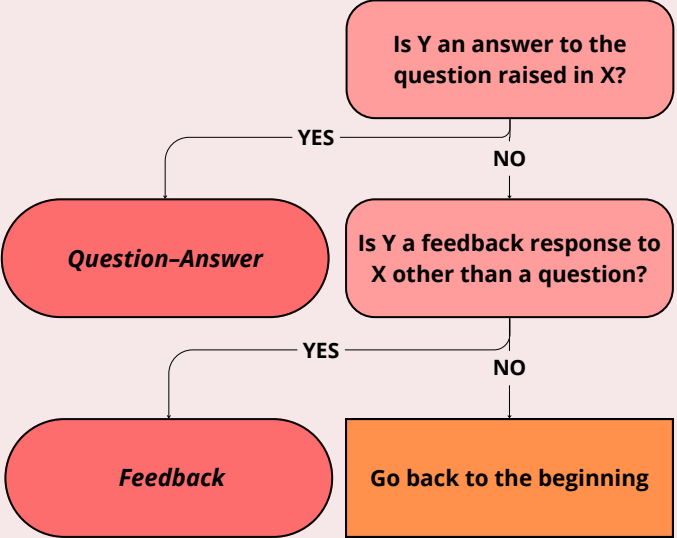

Supplement: SupplementaryMaterial [file decision-tree-new-old.pdf › pictures/decision-tree-new-old.pdf]
